# Supplementary material for: Sleep among Youth with Severely Disabling Chronic Pain: Before, during, and after Inpatient Intensive Interdisciplinary Pain Treatment
Source: MDPI journal article supplement (doi:10.3390/children8010042), 2021-01-12
Supplement: s1 [file s1]

**Table S1.** Mixed ANOVA results for sleep outcomes, removing outliers, by group (*FIRST Patients* vs. *Comparison Group*) across timepoints.

|                  | Sleep Onset<br>FIRST outliers removed: 1<br>CG outliers removed: 1             |          |          |                                 | Sleep Offset<br>FIRST outliers removed: 1<br>CG outliers removed: 0             |          |          |                                 | Duration<br>FIRST outliers removed: 2<br>CG outliers removed: 3             |          |          |                                 | Sleep Efficiency<br>FIRST outliers removed: 1<br>CG outliers removed: 1 |          |          |                                 |
|------------------|--------------------------------------------------------------------------------|----------|----------|---------------------------------|---------------------------------------------------------------------------------|----------|----------|---------------------------------|-----------------------------------------------------------------------------|----------|----------|---------------------------------|-------------------------------------------------------------------------|----------|----------|---------------------------------|
|                  | <i>df</i>                                                                      | <i>F</i> | <i>p</i> | <i>Partial eta</i> <sup>2</sup> | <i>df</i>                                                                       | <i>F</i> | <i>p</i> | <i>Partial eta</i> <sup>2</sup> | <i>df</i>                                                                   | <i>F</i> | <i>p</i> | <i>Partial eta</i> <sup>2</sup> | <i>df</i>                                                               | <i>F</i> | <i>p</i> | <i>Partial eta</i> <sup>2</sup> |
| Between subjects |                                                                                |          |          |                                 |                                                                                 |          |          |                                 |                                                                             |          |          |                                 |                                                                         |          |          |                                 |
| Group            | 1                                                                              | 8.29     | .01      | .36                             | 1                                                                               | 7.68     | .01      | .32                             | 1                                                                           | .002     | .97      | .000                            | 1                                                                       | 1.68     | .21      | .10                             |
| Within subjects  |                                                                                |          |          |                                 |                                                                                 |          |          |                                 |                                                                             |          |          |                                 |                                                                         |          |          |                                 |
| Time             | 2                                                                              | .21      | .81      | .01                             | 2                                                                               | 1.64     | .21      | .09                             | 2                                                                           | 2.58     | .10      | .18                             | 2                                                                       | 1.16     | .33      | .07                             |
| Time x Group     | 2                                                                              | 7.34     | .003     | .33                             | 2                                                                               | 4.28     | .02      | .21                             | 2                                                                           | 3.17     | .06      | .21                             | 2                                                                       | 1.73     | .20      | .10                             |
|                  | Sleep Onset Variability<br>FIRST outliers removed: 0<br>CG outliers removed: 1 |          |          |                                 | Sleep Offset Variability<br>FIRST outliers removed: 0<br>CG outliers removed: 1 |          |          |                                 | Duration Variability<br>FIRST outliers removed: 1<br>CG outliers removed: 0 |          |          |                                 |                                                                         |          |          |                                 |
|                  | <i>df</i>                                                                      | <i>F</i> | <i>p</i> | <i>Partial eta</i> <sup>2</sup> | <i>df</i>                                                                       | <i>F</i> | <i>p</i> | <i>Partial eta</i> <sup>2</sup> | <i>df</i>                                                                   | <i>F</i> | <i>p</i> | <i>Partial eta</i> <sup>2</sup> |                                                                         |          |          |                                 |
| Between subjects |                                                                                |          |          |                                 |                                                                                 |          |          |                                 |                                                                             |          |          |                                 |                                                                         |          |          |                                 |
| Group            | 1                                                                              | .46      | .51      | .03                             | 1                                                                               | .90      | .36      | .05                             | 1                                                                           | .27      | .61      | .02                             |                                                                         |          |          |                                 |
| Within subjects  |                                                                                |          |          |                                 |                                                                                 |          |          |                                 |                                                                             |          |          |                                 |                                                                         |          |          |                                 |
| Time             | 2                                                                              | 3.12     | .06      | .16                             | 2                                                                               | 5.0      | .01      | .24                             | 2                                                                           | 5.18     | .01      | .25                             |                                                                         |          |          |                                 |
| Time x Group     | 2                                                                              | 5.48     | .01      | .26                             | 2                                                                               | 7.36     | .002     | .32                             | 2                                                                           | 4.18     | .02      | .21                             |                                                                         |          |          |                                 |

Notes: \* indicates  $p < .05$ . FIRST Patients = patients receiving IIP through the Functional Independence Restoration (FIRST) Program; Comparison Group = similarly disabled sample receiving outpatient treatment-as-usual.

**Table S2.** Mixed ANOVA results for sleep outcomes, removing outliers and using log transformation, by group (*FIRST Patients* vs. *Comparison Group*) across timepoints.

| Sleep Onset                                         |           |          |          |                                 | Sleep Offset                                        |          |          |                                 | Duration                                            |          |          |                                 | Sleep Efficiency                                    |          |          |                                 |
|-----------------------------------------------------|-----------|----------|----------|---------------------------------|-----------------------------------------------------|----------|----------|---------------------------------|-----------------------------------------------------|----------|----------|---------------------------------|-----------------------------------------------------|----------|----------|---------------------------------|
| FIRST outliers removed: 1<br>CG outliers removed: 1 |           |          |          |                                 | FIRST outliers removed: 1<br>CG outliers removed: 0 |          |          |                                 | FIRST outliers removed: 2<br>CG outliers removed: 3 |          |          |                                 | FIRST outliers removed: 1<br>CG outliers removed: 1 |          |          |                                 |
|                                                     | <i>df</i> | <i>F</i> | <i>p</i> | <i>Partial eta</i> <sup>2</sup> | <i>df</i>                                           | <i>F</i> | <i>p</i> | <i>Partial eta</i> <sup>2</sup> | <i>df</i>                                           | <i>F</i> | <i>p</i> | <i>Partial eta</i> <sup>2</sup> | <i>df</i>                                           | <i>F</i> | <i>p</i> | <i>Partial eta</i> <sup>2</sup> |
| Between subjects                                    |           |          |          |                                 |                                                     |          |          |                                 |                                                     |          |          |                                 |                                                     |          |          |                                 |
| Group                                               | 1         | 8.74     | .01*     | .37                             | 1                                                   | 7.8      | .01*     | .33                             | 1                                                   | .000     | 1.00     | .000                            | 1                                                   | 1.65     | .22      | .10                             |
| Within subjects                                     |           |          |          |                                 |                                                     |          |          |                                 |                                                     |          |          |                                 |                                                     |          |          |                                 |
| Time                                                | 2         | .21      | .81      | .01                             | 2                                                   | 1.60     | .22      | .09                             | 2                                                   | 2.36     | .12      | .16                             | 2                                                   | 1.32     | .28      | .08                             |
| Time x Group                                        | 2         | 7.5      | .002*    | .33                             | 2                                                   | 4.35     | .02*     | .21                             | 2                                                   | 3.31     | .05      | .22                             | 2                                                   | 1.68     | .20      | .10                             |
| Sleep Onset Variability                             |           |          |          |                                 | Sleep Offset Variability                            |          |          |                                 | Duration Variability                                |          |          |                                 |                                                     |          |          |                                 |
| FIRST outliers removed: 0<br>CG outliers removed: 1 |           |          |          |                                 | FIRST outliers removed: 0<br>CG outliers removed: 1 |          |          |                                 | FIRST outliers removed: 1<br>CG outliers removed: 0 |          |          |                                 |                                                     |          |          |                                 |
|                                                     | <i>df</i> | <i>F</i> | <i>p</i> | <i>Partial eta</i> <sup>2</sup> | <i>df</i>                                           | <i>F</i> | <i>p</i> | <i>Partial eta</i> <sup>2</sup> | <i>df</i>                                           | <i>F</i> | <i>p</i> | <i>Partial eta</i> <sup>2</sup> |                                                     |          |          |                                 |
| Between subjects                                    |           |          |          |                                 |                                                     |          |          |                                 |                                                     |          |          |                                 |                                                     |          |          |                                 |
| Group                                               | 1         | .60      | .45      | .04                             | 1                                                   | 1.98     | .18      | .11                             | 1                                                   | 3.16     | .10      | .17                             |                                                     |          |          |                                 |
| Within subjects                                     |           |          |          |                                 |                                                     |          |          |                                 |                                                     |          |          |                                 |                                                     |          |          |                                 |
| Time                                                | 2         | 4.60     | .02*     | .22                             | 2                                                   | 14.91    | .000*    | .48                             | 2                                                   | 5.84     | .01*     | .27                             |                                                     |          |          |                                 |
| Time x Group                                        | 2         | 4.90     | .01*     | .23                             | 2                                                   | 14.77    | .000*    | .48                             | 2                                                   | 9.12     | .001*    | .36                             |                                                     |          |          |                                 |

Notes: \* indicates  $p < .05$ . FIRST Patients = patients receiving IIPT through the Functional Independence Restoration (FIRST) Program; Comparison Group = similarly disabled sample receiving outpatient treatment-as-usual.

**Table S3.** Mixed ANOVA results for weeknight only sleep outcomes by group (*FIRST Patients* vs. *Comparison Group*) across timepoints.

| Sleep Onset             |           |          |          |                                 | Sleep Offset             |          |          |                                 | Duration             |          |          |                                 | Sleep Efficiency |          |          |                                 |
|-------------------------|-----------|----------|----------|---------------------------------|--------------------------|----------|----------|---------------------------------|----------------------|----------|----------|---------------------------------|------------------|----------|----------|---------------------------------|
|                         | <i>df</i> | <i>F</i> | <i>p</i> | <i>Partial eta</i> <sup>2</sup> | <i>df</i>                | <i>F</i> | <i>p</i> | <i>Partial eta</i> <sup>2</sup> | <i>df</i>            | <i>F</i> | <i>p</i> | <i>Partial eta</i> <sup>2</sup> | <i>df</i>        | <i>F</i> | <i>p</i> | <i>Partial eta</i> <sup>2</sup> |
| Between subjects        |           |          |          |                                 |                          |          |          |                                 |                      |          |          |                                 |                  |          |          |                                 |
| Group                   | 1         | 1.26     | .28      | .07                             | 1                        | 1.99     | .18      | .11                             | 1                    | .11      | .74      | .01                             | 1                | 1.81     | .20      | .10                             |
| Within subjects         |           |          |          |                                 |                          |          |          |                                 |                      |          |          |                                 |                  |          |          |                                 |
| Time                    | 2         | .62      | .54      | .04                             | 2                        | 1.97     | .16      | .10                             | 2                    | 2.93     | .07      | .15                             | 2                | .14      | .87      | .01                             |
| Time x Group            | 2         | 4.68     | .02      | .22                             | 2                        | 2.54     | .09      | .13                             | 2                    | 3.38     | .05      | .17                             | 2                | .18      | .84      | .01                             |
| Sleep Onset Variability |           |          |          |                                 | Sleep Offset Variability |          |          |                                 | Duration Variability |          |          |                                 |                  |          |          |                                 |
|                         | <i>df</i> | <i>F</i> | <i>p</i> | <i>Partial eta</i> <sup>2</sup> | <i>df</i>                | <i>F</i> | <i>p</i> | <i>Partial eta</i> <sup>2</sup> | <i>df</i>            | <i>F</i> | <i>p</i> | <i>Partial eta</i> <sup>2</sup> |                  |          |          |                                 |
| Between subjects        |           |          |          |                                 |                          |          |          |                                 |                      |          |          |                                 |                  |          |          |                                 |
| Group                   | 1         | 1.10     | .31      | .06                             | 1                        | 1.07     | .32      | .06                             | 1                    | 1.16     | .30      | .06                             |                  |          |          |                                 |
| Within subjects         |           |          |          |                                 |                          |          |          |                                 |                      |          |          |                                 |                  |          |          |                                 |
| Time                    | 2         | 1.54     | .23      | .08                             | 2                        | 3.02     | .06      | .15                             | 2                    | 3.24     | .05      | .16                             |                  |          |          |                                 |
| Time x Group            | 2         | 4.38     | .02      | .21                             | 2                        | 3.42     | .05      | .17                             | 2                    | 2.09     | .14      | .11                             |                  |          |          |                                 |

Notes: \* indicates  $p < .05$ . FIRST Patients = patients receiving IIPT through the Functional Independence Restoration (FIRST) Program; Comparison Group = similarly disabled sample receiving outpatient treatment-as-usual.

**Table S4.** Post-hoc group differences in sleep outcomes, removing outliers, from Time 1 to Time 2, and Time 1 to Time 3 via the Mann-Whitney U Test

|                                 | FIRST Patients | Comparison Group |         |         |
|---------------------------------|----------------|------------------|---------|---------|
|                                 | Mean Rank      | Mean Rank        | Z-value | p-value |
| <b>Sleep Onset</b>              | N = 9          | N = 8            |         |         |
| Time 2 – Time 1                 | 5.67           | 12.75            | -2.89   | .002*   |
| Time 3 – Time 1                 | 7.22           | 11.00            | -1.54   | .14     |
| <b>Sleep Offset</b>             | N = 9          | N = 9            |         |         |
| Time 2 – Time 1                 | 6.33           | 12.67            | -2.52   | .01*    |
| Time 3 – Time 1                 | 8.00           | 11.00            | -1.19   | .26     |
| <b>Sleep Onset Variability</b>  | N = 10         | N = 8            |         |         |
| Time 2 – Time 1                 | 6.70           | 13.00            | -2.49   | .01*    |
| Time 3 – Time 1                 | 7.50           | 12.00            | -1.78   | .08     |
| <b>Sleep Offset Variability</b> | N = 10         | N = 8            |         |         |
| Time 2 – Time 1                 | 14.13          | 10.13            | -3.29   | .000*   |
| Time 3 – Time 1                 | 5.80           | 9.00             | -.44    | .67     |
| <b>Duration Variability</b>     | N = 9          | N = 9            |         |         |
| Time 2 – Time 1                 | 6.89           | 12.11            | -2.08   | .04     |
| Time 3 – Time 1                 | 9.00           | 10.00            | -.40    | .73     |

Notes: \* indicates  $p \leq .01$ . FIRST Patients = patients receiving IIPT through the Functional Independence Restoration (FIRST) Program; Comparison Group = similarly disabled sample receiving outpatient treatment-as-usual.
